# Supplementary material
Source: ML conference proceedings conference paper supplement (https://openreview.net/forum?id=iv1TpRCJeK)
Supplement: supplementary_material [file attachment]

unfold_eq:
  1. eq must be in initial sos, and process_initial_sos must be set.
  2. constants: if more than 3 unfoldable constants, no constants are unfolded.
  3. constant is unfolded only if it occurs in a negative clause.
